# Supplementary material for: A practical prognostic peripheral blood-based risk model for the evaluation of the likelihood of a response and survival of metastatic cancer patients treated with immune checkpoint inhibitors
Source: PubMed Central journal article supplement (PMC10694914; doi:10.1186/s12885-023-11699-0), 2023-12-04
Supplement: 12885_2023_11699_MOESM1_ESM.pdf [file 12885_2023_11699_MOESM1_ESM.pdf]

**Additional file 1** The numbers of OS and PFS events in the investigated patient groups

|                             | <b>Number of patients</b> | <b>OS event*<br/>n (%)</b> | <b>PFS event**<br/>n (%)</b> |
|-----------------------------|---------------------------|----------------------------|------------------------------|
| <b>All</b>                  | 158                       | 88 (55.7 %)                | 130 (82.3 %)                 |
| <b>Risk model</b>           | 109                       | 58 (53.2 %)                | 87 (79.8 %)                  |
| High-risk group             | 33                        | 25 (75.8 %)                | 29 (87.9 %)                  |
| Low-risk group              | 76                        | 33 (43.4 %)                | 58 (76.3 %)                  |
| <b>ICI only</b>             | 83                        | 48 (57.8 %)                | 69 (83.1 %)                  |
| High-risk group             | 27                        | 21 (77.8 %)                | 23 (85.2 %)                  |
| Low-risk group              | 56                        | 27 (48.2 %)                | 46 (82.1 %)                  |
| <b>ICI and chemotherapy</b> | 26                        | 10 (38.5 %)                | 18 (69.2 %)                  |
| High-risk group             | 6                         | 4 (66.7 %)                 | 6 (100 %)                    |
| Low-risk group              | 20                        | 6 (30.0 %)                 | 12 (60.0 %)                  |
| <b>NSCLC</b>                | 52                        | 28 (53.8 %)                | 40 (76.9 %)                  |
| High-risk group             | 15                        | 10 (66.7 %)                | 13 (86.7 %)                  |
| Low-risk group              | 37                        | 18 (48.6 %)                | 27 (73.0 %)                  |
| <b>Melanoma</b>             | 19                        | 12 (63.2 %)                | 17 (89.5 %)                  |
| High-risk group             | 3                         | 3 (100 %)                  | 3 (100 %)                    |
| Low-risk group              | 16                        | 9 (56.3 %)                 | 14 (87.5 %)                  |
| <b>Renal cell carcinoma</b> | 19                        | 10 (52.6 %)                | 17 (89.5 %)                  |
| High-risk group             | 9                         | 8 (88.9 %)                 | 8 (88.9 %)                   |
| Low-risk group              | 10                        | 2 (20.0 %)                 | 9 (90.0 %)                   |

OS, overall survival; PFS, progression-free survival; ICI, immune checkpoint inhibitor; NSCLC, non-small cell lung cancer; \*OS event=death; \*\*PFS event=tumor progression or death

**Additional file 2** ICI treatments of the patients

|                                            | <b>All</b><br>n=158<br>n (%) | <b>Risk model</b><br>n=109<br>n (%) | <b>Low-risk</b><br>n=76<br>n (%) | <b>High-risk</b><br>n=33<br>n (%) | <b>P value</b><br>Low vs.<br>high risk |
|--------------------------------------------|------------------------------|-------------------------------------|----------------------------------|-----------------------------------|----------------------------------------|
| <b>Line of ICI therapy</b>                 |                              |                                     |                                  |                                   | 0.395                                  |
| 1                                          | 84 (53.2 %)                  | 67 (61.5 %)                         | 49 (64.5 %)                      | 18 (54.5 %)                       |                                        |
| 2                                          | 49 (31.0 %)                  | 28 (25.7 %)                         | 16 (21.1 %)                      | 12 (36.4 %)                       |                                        |
| 3                                          | 14 (8.9 %)                   | 7 (6.4 %)                           | 5 (6.6 %)                        | 2 (6.1 %)                         |                                        |
| ≥4                                         | 11 (7.0 %)                   | 7 (6.4 %)                           | 6 (7.9 %)                        | 1 (3.0 %)                         |                                        |
| <b>PD-(L)1 inhibitor only</b>              | <b>119 (75.3 %)</b>          | <b>74 (67.9 %)</b>                  | <b>51 (67.1 %)</b>               | <b>23 (69.7 %)</b>                | 0.468                                  |
| Pembrolizumab                              | 60 (38.0 %)                  | 41 (37.6 %)                         | 29 (38.2 %)                      | 12 (36.4 %)                       |                                        |
| Nivolumab                                  | 55 (34.8 %)                  | 30 (27.5 %)                         | 19 (25.0 %)                      | 11 (33.3 %)                       |                                        |
| Atezolizumab                               | 4 (2.5 %)                    | 3 (2.8 %)                           | 3 (3.9 %)                        | 0 (0 %)                           |                                        |
| <b>PD-(L)1 inhibitor with chemotherapy</b> | <b>30 (19.0 %)</b>           | <b>26 (23.9 %)</b>                  | <b>20 (26.3 %)</b>               | <b>6 (18.2 %)</b>                 |                                        |
| Pembrolizumab + chemotherapy               | 29 (18.4 %)                  | 25 (22.9 %)                         | 19 (25.0 %)                      | 6 (18.2 %)                        |                                        |
| Atezolizumab + chemotherapy                | 1 (0.6 %)                    | 1 (0.9 %)                           | 1 (1.3 %)                        | 0 (0 %)                           |                                        |
| <b>Nivolumab + ipilimumab</b>              | <b>9 (5.7 %)</b>             | <b>9 (8.3 %)</b>                    | <b>5 (6.6 %)</b>                 | <b>4 (12.1 %)</b>                 |                                        |

ICI, immune checkpoint inhibitor; PD-(L)1, programmed death-1/programmed death ligand-1

**Additional file 3** COX univariate analyses for OS and PFS in the largest subgroups

| <b>OS</b>                          | <b>HR</b> | <b>95% CI</b> | <b>P value</b> | <b>PFS</b>                         | <b>HR</b> | <b>95% CI</b> | <b>P value</b> |
|------------------------------------|-----------|---------------|----------------|------------------------------------|-----------|---------------|----------------|
| <b>ICI only (n=83)</b>             |           |               |                | <b>ICI only (n=83)</b>             |           |               |                |
| High-risk group                    | 2.98      | 1.63-5.44     | <0.001*        | High-risk group                    | 1.70      | 1.02-2.84     | 0.041*         |
| <b>ICI and chemotherapy (n=26)</b> |           |               |                | <b>ICI and chemotherapy (n=26)</b> |           |               |                |
| High-risk group                    | 4.32      | 1.13-16.45    | 0.032*         | High-risk group                    | 3.66      | 1.34-9.96     | 0.011*         |
| <b>NSCLC (n=52)</b>                |           |               |                | <b>NSCLC (n=52)</b>                |           |               |                |
| High-risk group                    | 2.04      | 0.92-4.53     | 0.079          | High-risk group                    | 2.13      | 1.09-4.16     | 0.026*         |
| <b>Melanoma (n=19)</b>             |           |               |                | <b>Melanoma (n=19)</b>             |           |               |                |
| High-risk group                    | 22.72     | 2.27-227.26   | 0.008*         | High-risk group                    | 3.27      | 0.83-12.89    | 0.090          |
| <b>Renal cell carcinoma (n=19)</b> |           |               |                | <b>Renal cell carcinoma (n=19)</b> |           |               |                |
| High-risk group                    | 6.71      | 1.39-32.32    | 0.018*         | High-risk group                    | 1.17      | 0.43-3.13     | 0.761          |

OS, overall survival; PFS, progression-free survival; HR, hazard ratio; CI, confidence interval; ICI, immune checkpoint inhibitor; NSCLC, non-small cell lung cancer; \* p<0.05

**Additional file 4** COX univariate analyses for OS and PFS according to each laboratory parameter included in the risk model (A) and clinical parameters (B)

| <b>A. Laboratory parameters</b>      |           |               |                |                                     |           |               |                |
|--------------------------------------|-----------|---------------|----------------|-------------------------------------|-----------|---------------|----------------|
| <b>OS</b>                            | <b>HR</b> | <b>95% CI</b> | <b>P value</b> | <b>PFS</b>                          | <b>HR</b> | <b>95% CI</b> | <b>P value</b> |
| <b>Hb &lt;120</b><br>n=158           | 2.15      | 1.37-3.38     | 0.001*         | <b>Hb &lt;120</b><br>n=158          | 1.44      | 0.97-2.14     | 0.072          |
| <b>Platelets &gt;360</b><br>n=158    | 1.71      | 1.10-2.66     | 0.016*         | <b>Platelets &gt;360</b><br>n=158   | 1.55      | 1.08-2.24     | 0.018*         |
| <b>Neutrophils &gt;7.5</b><br>n=157  | 2.16      | 1.23-3.79     | 0.008*         | <b>Neutrophils &gt;7.5</b><br>n=157 | 1.45      | 0.89-2.36     | 0.141          |
| <b>CRP &gt;3</b><br>n=124            | 2.04      | 1.11-3.75     | 0.022*         | <b>CRP &gt;3</b><br>n=124           | 2.18      | 1.32-3.59     | 0.002*         |
| <b>ESR &gt;20</b><br>n=111           | 2.14      | 1.23-3.72     | 0.007*         | <b>ESR &gt;20</b><br>n=111          | 1.68      | 1.09-2.61     | 0.020*         |
| <b>LDH &gt;205</b><br>n=119          | 1.64      | 0.91-2.94     | 0.101          | <b>LDH &gt;205</b><br>n=119         | 1.66      | 1.03-2.69     | 0.038*         |
| <b>B. Clinical parameters, n=158</b> |           |               |                |                                     |           |               |                |
| <b>OS</b>                            | <b>HR</b> | <b>95% CI</b> | <b>P value</b> | <b>PFS</b>                          | <b>HR</b> | <b>95% CI</b> | <b>P value</b> |
| <b>Male sex</b>                      | 1.65      | 1.02-2.66     | 0.041*         | <b>Male sex</b>                     | 1.43      | 0.97-2.10     | 0.072          |
| <b>Age &gt;65 years</b>              | 0.68      | 0.45-1.04     | 0.077          | <b>Age &gt;65 years</b>             | 0.84      | 0.60-1.18     | 0.318          |
| <b>PS (WHO) ≥1</b>                   | 2.29      | 1.49-3.51     | <0.001*        | <b>PS (WHO) ≥1</b>                  | 2.05      | 1.44-2.92     | <0.001*        |
| <b>Therapy line &gt;1</b>            | 1.56      | 1.02-2.38     | 0.040*         | <b>Therapy line &gt;1</b>           | 1.34      | 0.95-1.89     | 0.099          |
| <b>Nodal metastases</b>              | 0.80      | 0.52-1.24     | 0.320          | <b>Nodal metastases</b>             | 0.86      | 0.60-1.24     | 0.426          |
| <b>Lung metastases</b>               | 0.88      | 0.58-1.35     | 0.564          | <b>Lung metastases</b>              | 1.08      | 0.76-1.53     | 0.681          |
| <b>Bone metastases</b>               | 1.75      | 1.14-2.70     | 0.011*         | <b>Bone metastases</b>              | 1.92      | 1.32-2.79     | 0.001*         |
| <b>Liver metastases</b>              | 2.99      | 1.88-4.74     | <0.001*        | <b>Liver metastases</b>             | 2.44      | 1.62-3.69     | <0.001*        |
| <b>Brain metastases</b>              | 2.57      | 1.39-4.76     | 0.003*         | <b>Brain metastases</b>             | 2.06      | 1.21-3.48     | 0.007*         |

OS, overall survival; PFS, progression-free survival; HR, hazard ratio; CI, confidence interval; Hb, hemoglobin; CRP, C-reactive protein; ESR, erythrocyte sedimentation rate; LDH, lactate dehydrogenase; PS, performance status; WHO, World Health Organization; \* p<0.05
